# Supplementary material for: Transcriptome analysis reveals pituitary lncRNA, circRNA and mRNA affecting fertility in high- and low-yielding goats
Source: Front Genet. 2023 Dec 12;14:1303031. doi: 10.3389/fgene.2023.1303031 (PMC10751935; doi:10.3389/fgene.2023.1303031)
Supplement: Supplementary file 1 [file Table2.XLSX]

## Sheet: bar graph
Table S2 GO pathway annotation of DE lncRNA target gene
GO ID (level1)	GO Term (level1)	GO ID (level2)	GO Term (level2)	number_of_out (All)	Genes_of_out
GO:0008150	Biological Process	GO:0001906	cell killing	1	ENSCHIG00000022485
GO:0008150	Biological Process	GO:0022610	biological adhesion	2	ENSCHIG00000022485,ENSCHIG00000025775
GO:0008150	Biological Process	GO:0048511	rhythmic process	1	ENSCHIG00000025775
GO:0008150	Biological Process	GO:0002376	immune system process	2	ENSCHIG00000022485,ENSCHIG00000025775
GO:0008150	Biological Process	GO:0048519	negative regulation of biological process	3	ENSCHIG00000022485,ENSCHIG00000025775,ENSCHIG00000026036
GO:0008150	Biological Process	GO:0032502	developmental process	3	ENSCHIG00000022485,ENSCHIG00000025775,ENSCHIG00000026036
GO:0008150	Biological Process	GO:0048518	positive regulation of biological process	3	ENSCHIG00000022485,ENSCHIG00000025775,ENSCHIG00000026036
GO:0008150	Biological Process	GO:0050896	response to stimulus	4	ENSCHIG00000015207,ENSCHIG00000022485,ENSCHIG00000025775,ENSCHIG00000026036
GO:0008150	Biological Process	GO:0023052	signaling	3	ENSCHIG00000022485,ENSCHIG00000025775,ENSCHIG00000026036
GO:0008150	Biological Process	GO:0032501	multicellular organismal process	3	ENSCHIG00000022485,ENSCHIG00000025775,ENSCHIG00000026036
GO:0008150	Biological Process	GO:0040011	locomotion	1	ENSCHIG00000022485
GO:0008150	Biological Process	GO:0051704	multi-organism process	1	ENSCHIG00000022485
GO:0008150	Biological Process	GO:0008152	metabolic process	5	ENSCHIG00000009898,ENSCHIG00000015207,ENSCHIG00000018496,ENSCHIG00000022485,ENSCHIG00000025775
GO:0008150	Biological Process	GO:0071840	cellular component organization or biogenesis	2	ENSCHIG00000018496,ENSCHIG00000022485
GO:0008150	Biological Process	GO:0050789	regulation of biological process	4	ENSCHIG00000015207,ENSCHIG00000022485,ENSCHIG00000025775,ENSCHIG00000026036
GO:0008150	Biological Process	GO:0065007	biological regulation	4	ENSCHIG00000015207,ENSCHIG00000022485,ENSCHIG00000025775,ENSCHIG00000026036
GO:0008150	Biological Process	GO:0009987	cellular process	6	ENSCHIG00000015207,ENSCHIG00000018496,ENSCHIG00000019711,ENSCHIG00000022485,ENSCHIG00000025775,ENSCHIG00000026036
GO:0008150	Biological Process	GO:0051179	localization	1	ENSCHIG00000022485
GO:0008150	Biological Process	GO:0044699	single-organism process	3	ENSCHIG00000022485,ENSCHIG00000025775,ENSCHIG00000026036
GO:0003674	Molecular Function	GO:0001071	nucleic acid binding transcription factor activity	1	ENSCHIG00000025775
GO:0003674	Molecular Function	GO:0003824	catalytic activity	3	ENSCHIG00000009898,ENSCHIG00000019711,ENSCHIG00000022485
GO:0003674	Molecular Function	GO:0004871	signal transducer activity	1	ENSCHIG00000025775
GO:0003674	Molecular Function	GO:0005488	binding	5	ENSCHIG00000018496,ENSCHIG00000019711,ENSCHIG00000022485,ENSCHIG00000025775,ENSCHIG00000026036
GO:0005575	Cellular Component	GO:0044421	extracellular region part	3	ENSCHIG00000009898,ENSCHIG00000018496,ENSCHIG00000026036
GO:0005575	Cellular Component	GO:0005576	extracellular region	3	ENSCHIG00000009898,ENSCHIG00000018496,ENSCHIG00000026036
GO:0005575	Cellular Component	GO:0030054	cell junction	1	ENSCHIG00000022485
GO:0005575	Cellular Component	GO:0044425	membrane part	2	ENSCHIG00000007384,ENSCHIG00000022485
GO:0005575	Cellular Component	GO:0031974	membrane-enclosed lumen	1	ENSCHIG00000018496
GO:0005575	Cellular Component	GO:0016020	membrane	2	ENSCHIG00000007384,ENSCHIG00000022485
GO:0005575	Cellular Component	GO:0044422	organelle part	1	ENSCHIG00000018496
GO:0005575	Cellular Component	GO:0043226	organelle	2	ENSCHIG00000018496,ENSCHIG00000025775
GO:0005575	Cellular Component	GO:0005623	cell	3	ENSCHIG00000018496,ENSCHIG00000022485,ENSCHIG00000025775
GO:0005575	Cellular Component	GO:0044464	cell part	3	ENSCHIG00000018496,ENSCHIG00000022485,ENSCHIG00000025775
