# Supplementary material for: Transcriptome analysis reveals pituitary lncRNA, circRNA and mRNA affecting fertility in high- and low-yielding goats
Source: Front Genet. 2023 Dec 12;14:1303031. doi: 10.3389/fgene.2023.1303031 (PMC10751935; doi:10.3389/fgene.2023.1303031)
Supplement: Supplementary file 2 [file Table3.XLSX]

## Sheet: Sheet1
Table S3 DE lncRNA target gene KEGG pathway annotation
KEGG_A_class	KEGG_B_class	Pathway	out (4)	All (8783)	Pvalue	Qvalue	Pathway ID	Genes	K_IDs
Organismal Systems	Environmental adaptation	Circadian rhythm	1	35	0.0158475	0.0777529	ko04710	ENSCHIG00000025775	K08532
Human Diseases	Immune disease	Primary immunodeficiency	1	43	0.0194432	0.0777529	ko05340	ENSCHIG00000022485	K06478
Human Diseases	Drug resistance: antineoplastic	Antifolate resistance	1	47	0.0212374	0.0777529	ko01523	ENSCHIG00000009898	K01307
Metabolism	Metabolism of cofactors and vitamins	Folate biosynthesis	1	53	0.023924	0.0777529	ko00790	ENSCHIG00000009898	K01307
Human Diseases	Immune disease	Inflammatory bowel disease	1	84	0.0377168	0.0805042	ko05321	ENSCHIG00000025775	K08532
Human Diseases	Neurodegenerative disease	Spinocerebellar ataxia	1	103	0.0460978	0.0805042	ko05017	ENSCHIG00000025775	K08532
Organismal Systems	Immune system	Fc gamma R-mediated phagocytosis	1	109	0.048733	0.0805042	ko04666	ENSCHIG00000022485	K06478
Organismal Systems	Immune system	T cell receptor signaling pathway	1	117	0.0522382	0.0805042	ko04660	ENSCHIG00000022485	K06478
Organismal Systems	Immune system	Th17 cell differentiation	1	125	0.0557337	0.0805042	ko04659	ENSCHIG00000025775	K08532
Environmental Information Processing	Signal transduction	Wnt signaling pathway	1	158	0.0700503	0.0910654	ko04310	ENSCHIG00000026036	K02165
Environmental Information Processing	Signaling molecules and interaction	Cell adhesion molecules	1	179	0.0790758	0.0934532	ko04514	ENSCHIG00000022485	K06478
Human Diseases	Infectious disease: bacterial	Salmonella infection	1	256	0.111608	0.120909	ko05132	ENSCHIG00000022485	K06478
Human Diseases	Neurodegenerative disease	Alzheimer disease	1	387	0.164965	0.164965	ko05010	ENSCHIG00000026036	K02165
