# Supplementary material for: Transcriptome analysis reveals pituitary lncRNA, circRNA and mRNA affecting fertility in high- and low-yielding goats
Source: Front Genet. 2023 Dec 12;14:1303031. doi: 10.3389/fgene.2023.1303031 (PMC10751935; doi:10.3389/fgene.2023.1303031)
Supplement: Supplementary file 3 [file Table9.XLSX]

## Sheet: Sheet1
Table S9 DE circRNA and its host gene
DE circRNAs	Host genes
MAB21L3	chicirc_175816
MAB21L3	chicirc_117571
STX17	chicirc_153539
RIMS4	chicirc_092481
GSG1L	chicirc_055120
OSMR	chicirc_029285
OSMR	chicirc_026618
OSMR	chicirc_129655
OSBPL10	chicirc_002310
ENSCHIG00000022554	chicirc_174192
ENSCHIG00000022554	chicirc_019685
ENSCHIG00000022554	chicirc_062509
ENSCHIG00000022554	chicirc_068523
SLC44A5	chicirc_016686
SLC44A5	chicirc_165331
SLC44A5	chicirc_102826
SLC44A5	chicirc_108266
SLC44A5	chicirc_096580
SLC44A5	chicirc_019173
SLC44A5	chicirc_115257
SLC44A5	chicirc_144538
SLC44A5	chicirc_111153
TNIK	chicirc_100669
ENSCHIG00000018623	chicirc_104813
ENSCHIG00000018623	chicirc_005775
ENSCHIG00000018623	chicirc_044501
ENSCHIG00000018623	chicirc_068319
ENSCHIG00000018623	chicirc_142605
ENSCHIG00000018623	chicirc_092047
ENSCHIG00000018623	chicirc_106403
ENSCHIG00000018623	chicirc_159522
ENSCHIG00000018623	chicirc_154592
ENSCHIG00000018623	chicirc_136711
ENSCHIG00000018623	chicirc_151213
ENSCHIG00000018623	chicirc_099928
ENSCHIG00000018623	chicirc_050943
ENSCHIG00000018623	chicirc_081876
ENSCHIG00000018623	chicirc_019489
ENSCHIG00000018623	chicirc_005496
ENSCHIG00000018623	chicirc_080288
ENSCHIG00000018623	chicirc_120769
PHACTR3	chicirc_167898
PHACTR3	chicirc_078797
PHACTR3	chicirc_027106
PHACTR3	chicirc_184563
PHACTR3	chicirc_032159
PHACTR3	chicirc_096746
PHACTR3	chicirc_040044
PHACTR3	chicirc_091374
SSUH2	chicirc_062863
ENSCHIG00000021876	chicirc_045479
SYCP1	chicirc_171642
SYCP1	chicirc_036545
SYCP1	chicirc_096711
SYCP1	chicirc_112281
ATP8B1	chicirc_160342
ATP8B1	chicirc_178863
ATP8B1	chicirc_138451
ENSCHIG00000018895	chicirc_002448
ENSCHIG00000018895	chicirc_130790
ENSCHIG00000018895	chicirc_157062
TGFBR2	chicirc_183746
ZNF529	chicirc_000551
IL33	chicirc_120485
IL33	chicirc_118351
IL33	chicirc_096030
IL33	chicirc_023611
IL33	chicirc_059906
MORC1	chicirc_109025
MORC1	chicirc_178997
MORC1	chicirc_014809
MORC1	chicirc_102691
C4BPB	chicirc_059202
ENSCHIG00000026739	chicirc_127120
ENSCHIG00000026739	chicirc_193094
CLEC16A	chicirc_131778
GABBR2	chicirc_018248
GABBR2	chicirc_122554
GABBR2	chicirc_087101
GABBR2	chicirc_078945
THBS1	chicirc_012906
THBS1	chicirc_045261
THBS1	chicirc_051229
BAG3	chicirc_124821
ZFYVE28	chicirc_151835
BAZ1A	chicirc_153725
HPS3	chicirc_061339
CEND1	chicirc_119056
DKK2	chicirc_158631
DKK2	chicirc_182520
