# Supplementary material for: Transcriptome analysis reveals pituitary lncRNA, circRNA and mRNA affecting fertility in high- and low-yielding goats
Source: Front Genet. 2023 Dec 12;14:1303031. doi: 10.3389/fgene.2023.1303031 (PMC10751935; doi:10.3389/fgene.2023.1303031)
Supplement: Supplementary file 4 [file Table6.XLSX]

## Sheet: bar graph
Table S6 GO pathway annotation of DE mRNA target gene
GO ID (level1)	GO Term (level1)	GO ID (level2)	GO Term (level2)	number_of_out (up)	number_of_out (down)	Genes_of_out_up	Genes_of_out_down
GO:0008150	Biological Process	GO:0048519	negative regulation of biological process	10	14	ENSCHIG00000007777,ENSCHIG00000007804,ENSCHIG00000011539,ENSCHIG00000016657,ENSCHIG00000016965,ENSCHIG00000017334,ENSCHIG00000018895,ENSCHIG00000020797,ENSCHIG00000021023,ENSCHIG00000022382	ENSCHIG00000003475,ENSCHIG00000006042,ENSCHIG00000011289,ENSCHIG00000012416,ENSCHIG00000012922,ENSCHIG00000013658,ENSCHIG00000014072,ENSCHIG00000014905,ENSCHIG00000015367,ENSCHIG00000017641,ENSCHIG00000019195,ENSCHIG00000020858,ENSCHIG00000026036,ENSCHIG00000026258
GO:0008150	Biological Process	GO:0007610	behavior	3	3	ENSCHIG00000011516,ENSCHIG00000020797,ENSCHIG00000022382	ENSCHIG00000003475,ENSCHIG00000017641,ENSCHIG00000020858
GO:0008150	Biological Process	GO:0065007	biological regulation	23	21	ENSCHIG00000004660,ENSCHIG00000005870,ENSCHIG00000006038,ENSCHIG00000007777,ENSCHIG00000007804,ENSCHIG00000011060,ENSCHIG00000011516,ENSCHIG00000011539,ENSCHIG00000014876,ENSCHIG00000015639,ENSCHIG00000016657,ENSCHIG00000016965,ENSCHIG00000017334,ENSCHIG00000017723,ENSCHIG00000018895,ENSCHIG00000019909,ENSCHIG00000020797,ENSCHIG00000021023,ENSCHIG00000021677,ENSCHIG00000022382,ENSCHIG00000024967,…	ENSCHIG00000003475,ENSCHIG00000006042,ENSCHIG00000006685,ENSCHIG00000007322,ENSCHIG00000009367,ENSCHIG00000010172,ENSCHIG00000011289,ENSCHIG00000012416,ENSCHIG00000012922,ENSCHIG00000013658,ENSCHIG00000014072,ENSCHIG00000014905,ENSCHIG00000015367,ENSCHIG00000017641,ENSCHIG00000018287,ENSCHIG00000019195,ENSCHIG00000020858,ENSCHIG00000021751,ENSCHIG00000022845,ENSCHIG00000026036,ENSCHIG00000026258
GO:0008150	Biological Process	GO:0032501	multicellular organismal process	14	13	ENSCHIG00000007777,ENSCHIG00000007804,ENSCHIG00000011516,ENSCHIG00000014876,ENSCHIG00000016657,ENSCHIG00000016965,ENSCHIG00000017334,ENSCHIG00000017723,ENSCHIG00000017843,ENSCHIG00000019909,ENSCHIG00000020797,ENSCHIG00000021708,ENSCHIG00000022382,ENSCHIG00000026726	ENSCHIG00000003475,ENSCHIG00000006042,ENSCHIG00000010815,ENSCHIG00000012416,ENSCHIG00000013658,ENSCHIG00000014072,ENSCHIG00000015367,ENSCHIG00000017641,ENSCHIG00000020858,ENSCHIG00000021751,ENSCHIG00000022845,ENSCHIG00000026036,ENSCHIG00000026258
GO:0008150	Biological Process	GO:0051179	localization	14	10	ENSCHIG00000004660,ENSCHIG00000006038,ENSCHIG00000011516,ENSCHIG00000015639,ENSCHIG00000016657,ENSCHIG00000016965,ENSCHIG00000017334,ENSCHIG00000019220,ENSCHIG00000019909,ENSCHIG00000020797,ENSCHIG00000021677,ENSCHIG00000024771,ENSCHIG00000025277,ENSCHIG00000026726	ENSCHIG00000003475,ENSCHIG00000006042,ENSCHIG00000012416,ENSCHIG00000014072,ENSCHIG00000014905,ENSCHIG00000017105,ENSCHIG00000017641,ENSCHIG00000019195,ENSCHIG00000020858,ENSCHIG00000026769
GO:0008150	Biological Process	GO:0050789	regulation of biological process	21	21	ENSCHIG00000004660,ENSCHIG00000005870,ENSCHIG00000006038,ENSCHIG00000007777,ENSCHIG00000007804,ENSCHIG00000011060,ENSCHIG00000011516,ENSCHIG00000011539,ENSCHIG00000014876,ENSCHIG00000016657,ENSCHIG00000016965,ENSCHIG00000017334,ENSCHIG00000017723,ENSCHIG00000018895,ENSCHIG00000019909,ENSCHIG00000020797,ENSCHIG00000021023,ENSCHIG00000021677,ENSCHIG00000022382,ENSCHIG00000024967,ENSCHIG00000025277	ENSCHIG00000003475,ENSCHIG00000006042,ENSCHIG00000006685,ENSCHIG00000007322,ENSCHIG00000009367,ENSCHIG00000010172,ENSCHIG00000011289,ENSCHIG00000012416,ENSCHIG00000012922,ENSCHIG00000013658,ENSCHIG00000014072,ENSCHIG00000014905,ENSCHIG00000015367,ENSCHIG00000017641,ENSCHIG00000018287,ENSCHIG00000019195,ENSCHIG00000020858,ENSCHIG00000021751,ENSCHIG00000022845,ENSCHIG00000026036,ENSCHIG00000026258
GO:0008150	Biological Process	GO:0032502	developmental process	10	10	ENSCHIG00000007804,ENSCHIG00000011516,ENSCHIG00000014876,ENSCHIG00000016657,ENSCHIG00000016965,ENSCHIG00000017334,ENSCHIG00000017723,ENSCHIG00000019909,ENSCHIG00000020797,ENSCHIG00000021708	ENSCHIG00000006042,ENSCHIG00000010815,ENSCHIG00000012416,ENSCHIG00000013658,ENSCHIG00000014072,ENSCHIG00000015367,ENSCHIG00000017641,ENSCHIG00000020858,ENSCHIG00000021751,ENSCHIG00000026036
GO:0008150	Biological Process	GO:0050896	response to stimulus	10	20	ENSCHIG00000006038,ENSCHIG00000011516,ENSCHIG00000011539,ENSCHIG00000016657,ENSCHIG00000016965,ENSCHIG00000017334,ENSCHIG00000019909,ENSCHIG00000022382,ENSCHIG00000024967,ENSCHIG00000026726	ENSCHIG00000003475,ENSCHIG00000006042,ENSCHIG00000006685,ENSCHIG00000007322,ENSCHIG00000009367,ENSCHIG00000011289,ENSCHIG00000012416,ENSCHIG00000012922,ENSCHIG00000014072,ENSCHIG00000014217,ENSCHIG00000014905,ENSCHIG00000015230,ENSCHIG00000015367,ENSCHIG00000017641,ENSCHIG00000018287,ENSCHIG00000019195,ENSCHIG00000020858,ENSCHIG00000022845,ENSCHIG00000026036,ENSCHIG00000026258
GO:0008150	Biological Process	GO:0048511	rhythmic process	2	0	ENSCHIG00000011516,ENSCHIG00000017334	--
GO:0008150	Biological Process	GO:0022610	biological adhesion	2	4	ENSCHIG00000016657,ENSCHIG00000016965	ENSCHIG00000013658,ENSCHIG00000014072,ENSCHIG00000017641,ENSCHIG00000020858
GO:0008150	Biological Process	GO:0040011	locomotion	2	5	ENSCHIG00000020797,ENSCHIG00000021677	ENSCHIG00000003475,ENSCHIG00000014072,ENSCHIG00000014217,ENSCHIG00000017641,ENSCHIG00000020858
GO:0008150	Biological Process	GO:0048518	positive regulation of biological process	8	12	ENSCHIG00000004660,ENSCHIG00000006038,ENSCHIG00000014876,ENSCHIG00000016657,ENSCHIG00000016965,ENSCHIG00000017334,ENSCHIG00000017723,ENSCHIG00000025277	ENSCHIG00000003475,ENSCHIG00000006042,ENSCHIG00000009367,ENSCHIG00000013658,ENSCHIG00000014072,ENSCHIG00000014905,ENSCHIG00000015367,ENSCHIG00000017641,ENSCHIG00000018287,ENSCHIG00000019195,ENSCHIG00000020858,ENSCHIG00000026036
GO:0008150	Biological Process	GO:0001906	cell killing	1	0	ENSCHIG00000016965	--
GO:0008150	Biological Process	GO:0023052	signaling	6	15	ENSCHIG00000006038,ENSCHIG00000011539,ENSCHIG00000016657,ENSCHIG00000016965,ENSCHIG00000017334,ENSCHIG00000024967	ENSCHIG00000003475,ENSCHIG00000006042,ENSCHIG00000006685,ENSCHIG00000007322,ENSCHIG00000009367,ENSCHIG00000011289,ENSCHIG00000012922,ENSCHIG00000014072,ENSCHIG00000015367,ENSCHIG00000017641,ENSCHIG00000018287,ENSCHIG00000019195,ENSCHIG00000020858,ENSCHIG00000022845,ENSCHIG00000026036
GO:0008150	Biological Process	GO:0040007	growth	2	1	ENSCHIG00000017334,ENSCHIG00000017723	ENSCHIG00000006042
GO:0008150	Biological Process	GO:0002376	immune system process	1	6	ENSCHIG00000016965	ENSCHIG00000003475,ENSCHIG00000006042,ENSCHIG00000014217,ENSCHIG00000014905,ENSCHIG00000017641,ENSCHIG00000020858
GO:0008150	Biological Process	GO:0044699	single-organism process	24	23	ENSCHIG00000004660,ENSCHIG00000006038,ENSCHIG00000007777,ENSCHIG00000007804,ENSCHIG00000011516,ENSCHIG00000011539,ENSCHIG00000013525,ENSCHIG00000014876,ENSCHIG00000015639,ENSCHIG00000016657,ENSCHIG00000016965,ENSCHIG00000017334,ENSCHIG00000017723,ENSCHIG00000019220,ENSCHIG00000019909,ENSCHIG00000020797,ENSCHIG00000021677,ENSCHIG00000021708,ENSCHIG00000022382,ENSCHIG00000022554,ENSCHIG00000024771,…	ENSCHIG00000003475,ENSCHIG00000006042,ENSCHIG00000006685,ENSCHIG00000007322,ENSCHIG00000009367,ENSCHIG00000010815,ENSCHIG00000011289,ENSCHIG00000012416,ENSCHIG00000012922,ENSCHIG00000013658,ENSCHIG00000014072,ENSCHIG00000014905,ENSCHIG00000015230,ENSCHIG00000015367,ENSCHIG00000017105,ENSCHIG00000017641,ENSCHIG00000018287,ENSCHIG00000019195,ENSCHIG00000020858,ENSCHIG00000021751,ENSCHIG00000022845,…
GO:0008150	Biological Process	GO:0051704	multi-organism process	3	2	ENSCHIG00000016965,ENSCHIG00000019909,ENSCHIG00000022382	ENSCHIG00000014905,ENSCHIG00000020858
GO:0008150	Biological Process	GO:0071840	cellular component organization or biogenesis	8	9	ENSCHIG00000011516,ENSCHIG00000014876,ENSCHIG00000016657,ENSCHIG00000017334,ENSCHIG00000017723,ENSCHIG00000019909,ENSCHIG00000021677,ENSCHIG00000022382	ENSCHIG00000006042,ENSCHIG00000012416,ENSCHIG00000013658,ENSCHIG00000014072,ENSCHIG00000014905,ENSCHIG00000017641,ENSCHIG00000019365,ENSCHIG00000020858,ENSCHIG00000021751
GO:0008150	Biological Process	GO:0022414	reproductive process	3	0	ENSCHIG00000017334,ENSCHIG00000019909,ENSCHIG00000022382	--
GO:0008150	Biological Process	GO:0000003	reproduction	3	0	ENSCHIG00000017334,ENSCHIG00000019909,ENSCHIG00000022382	--
GO:0008150	Biological Process	GO:0008152	metabolic process	17	18	ENSCHIG00000004660,ENSCHIG00000005870,ENSCHIG00000007777,ENSCHIG00000007804,ENSCHIG00000009441,ENSCHIG00000011060,ENSCHIG00000011258,ENSCHIG00000011539,ENSCHIG00000013525,ENSCHIG00000016965,ENSCHIG00000017334,ENSCHIG00000018895,ENSCHIG00000019909,ENSCHIG00000019952,ENSCHIG00000021023,ENSCHIG00000022382,ENSCHIG00000022554	ENSCHIG00000003475,ENSCHIG00000006042,ENSCHIG00000010172,ENSCHIG00000010903,ENSCHIG00000011289,ENSCHIG00000012416,ENSCHIG00000012922,ENSCHIG00000014072,ENSCHIG00000014905,ENSCHIG00000015367,ENSCHIG00000017105,ENSCHIG00000017641,ENSCHIG00000019195,ENSCHIG00000019365,ENSCHIG00000020847,ENSCHIG00000020858,ENSCHIG00000021751,ENSCHIG00000026258
GO:0008150	Biological Process	GO:0009987	cellular process	24	27	ENSCHIG00000004660,ENSCHIG00000005870,ENSCHIG00000006038,ENSCHIG00000007777,ENSCHIG00000007804,ENSCHIG00000011060,ENSCHIG00000011258,ENSCHIG00000011516,ENSCHIG00000011539,ENSCHIG00000014876,ENSCHIG00000015639,ENSCHIG00000016657,ENSCHIG00000016965,ENSCHIG00000017334,ENSCHIG00000017723,ENSCHIG00000019909,ENSCHIG00000019952,ENSCHIG00000020797,ENSCHIG00000021023,ENSCHIG00000021677,ENSCHIG00000022382,…	ENSCHIG00000003475,ENSCHIG00000006042,ENSCHIG00000006685,ENSCHIG00000007322,ENSCHIG00000009367,ENSCHIG00000010172,ENSCHIG00000010815,ENSCHIG00000010903,ENSCHIG00000011289,ENSCHIG00000012416,ENSCHIG00000012922,ENSCHIG00000013658,ENSCHIG00000014072,ENSCHIG00000014905,ENSCHIG00000015230,ENSCHIG00000015367,ENSCHIG00000017641,ENSCHIG00000018287,ENSCHIG00000019195,ENSCHIG00000019365,ENSCHIG00000020847,…
GO:0003674	Molecular Function	GO:0005488	binding	26	25	ENSCHIG00000003436,ENSCHIG00000004660,ENSCHIG00000005870,ENSCHIG00000007777,ENSCHIG00000011060,ENSCHIG00000011258,ENSCHIG00000011516,ENSCHIG00000011539,ENSCHIG00000013525,ENSCHIG00000014876,ENSCHIG00000015639,ENSCHIG00000016657,ENSCHIG00000016965,ENSCHIG00000017334,ENSCHIG00000017723,ENSCHIG00000019220,ENSCHIG00000019909,ENSCHIG00000019952,ENSCHIG00000021023,ENSCHIG00000021677,ENSCHIG00000022382,…	ENSCHIG00000006042,ENSCHIG00000006685,ENSCHIG00000009367,ENSCHIG00000010172,ENSCHIG00000010903,ENSCHIG00000012416,ENSCHIG00000013658,ENSCHIG00000014072,ENSCHIG00000014217,ENSCHIG00000015367,ENSCHIG00000015588,ENSCHIG00000016377,ENSCHIG00000017105,ENSCHIG00000017153,ENSCHIG00000017641,ENSCHIG00000018287,ENSCHIG00000018623,ENSCHIG00000019195,ENSCHIG00000019365,ENSCHIG00000020304,ENSCHIG00000020804,…
GO:0003674	Molecular Function	GO:0098772	molecular function regulator	3	4	ENSCHIG00000016965,ENSCHIG00000018895,ENSCHIG00000021023	ENSCHIG00000006042,ENSCHIG00000019195,ENSCHIG00000020858,ENSCHIG00000026258
GO:0003674	Molecular Function	GO:0005215	transporter activity	4	2	ENSCHIG00000011516,ENSCHIG00000019220,ENSCHIG00000024771,ENSCHIG00000026726	ENSCHIG00000012416,ENSCHIG00000026769
GO:0003674	Molecular Function	GO:0001071	nucleic acid binding transcription factor activity	2	2	ENSCHIG00000011060,ENSCHIG00000017334	ENSCHIG00000010172,ENSCHIG00000015367
GO:0003674	Molecular Function	GO:0004871	signal transducer activity	3	3	ENSCHIG00000006038,ENSCHIG00000017723,ENSCHIG00000024967	ENSCHIG00000003475,ENSCHIG00000007322,ENSCHIG00000009367
GO:0003674	Molecular Function	GO:0060089	molecular transducer activity	3	3	ENSCHIG00000006038,ENSCHIG00000017723,ENSCHIG00000024967	ENSCHIG00000003475,ENSCHIG00000007322,ENSCHIG00000009367
GO:0003674	Molecular Function	GO:0005198	structural molecule activity	0	1	--	ENSCHIG00000010903
GO:0003674	Molecular Function	GO:0003824	catalytic activity	6	4	ENSCHIG00000009441,ENSCHIG00000011258,ENSCHIG00000013525,ENSCHIG00000016965,ENSCHIG00000019952,ENSCHIG00000022554	ENSCHIG00000006042,ENSCHIG00000011289,ENSCHIG00000012416,ENSCHIG00000012922
GO:0005575	Cellular Component	GO:0005576	extracellular region	3	11	ENSCHIG00000016657,ENSCHIG00000016965,ENSCHIG00000018895	ENSCHIG00000006685,ENSCHIG00000014072,ENSCHIG00000014217,ENSCHIG00000014905,ENSCHIG00000015588,ENSCHIG00000016089,ENSCHIG00000017105,ENSCHIG00000017641,ENSCHIG00000020858,ENSCHIG00000022845,ENSCHIG00000026036
GO:0005575	Cellular Component	GO:0044421	extracellular region part	1	6	ENSCHIG00000016965	ENSCHIG00000014072,ENSCHIG00000014905,ENSCHIG00000015588,ENSCHIG00000017641,ENSCHIG00000020858,ENSCHIG00000026036
GO:0005575	Cellular Component	GO:0044456	synapse part	4	0	ENSCHIG00000011516,ENSCHIG00000015639,ENSCHIG00000016657,ENSCHIG00000017943	--
GO:0005575	Cellular Component	GO:0045202	synapse	4	1	ENSCHIG00000011516,ENSCHIG00000015639,ENSCHIG00000016657,ENSCHIG00000017943	ENSCHIG00000022845
GO:0005575	Cellular Component	GO:0031012	extracellular matrix	0	1	--	ENSCHIG00000017641
GO:0005575	Cellular Component	GO:0016020	membrane	17	13	ENSCHIG00000006038,ENSCHIG00000009441,ENSCHIG00000011516,ENSCHIG00000011539,ENSCHIG00000013525,ENSCHIG00000014876,ENSCHIG00000015639,ENSCHIG00000016657,ENSCHIG00000017723,ENSCHIG00000020797,ENSCHIG00000021553,ENSCHIG00000021677,ENSCHIG00000021876,ENSCHIG00000022554,ENSCHIG00000024967,ENSCHIG00000025277,ENSCHIG00000026726	ENSCHIG00000003475,ENSCHIG00000007322,ENSCHIG00000009367,ENSCHIG00000010815,ENSCHIG00000012416,ENSCHIG00000012753,ENSCHIG00000013658,ENSCHIG00000014072,ENSCHIG00000017641,ENSCHIG00000018287,ENSCHIG00000019195,ENSCHIG00000021751,ENSCHIG00000026769
GO:0005575	Cellular Component	GO:0044425	membrane part	14	10	ENSCHIG00000006038,ENSCHIG00000009441,ENSCHIG00000011516,ENSCHIG00000013525,ENSCHIG00000014876,ENSCHIG00000015639,ENSCHIG00000016657,ENSCHIG00000017723,ENSCHIG00000020797,ENSCHIG00000021553,ENSCHIG00000021876,ENSCHIG00000024967,ENSCHIG00000025277,ENSCHIG00000026726	ENSCHIG00000003475,ENSCHIG00000007322,ENSCHIG00000009367,ENSCHIG00000012416,ENSCHIG00000012753,ENSCHIG00000013658,ENSCHIG00000017641,ENSCHIG00000018287,ENSCHIG00000021751,ENSCHIG00000026769
GO:0005575	Cellular Component	GO:0032991	macromolecular complex	7	9	ENSCHIG00000003436,ENSCHIG00000011516,ENSCHIG00000016965,ENSCHIG00000019220,ENSCHIG00000024771,ENSCHIG00000024967,ENSCHIG00000025277	ENSCHIG00000006042,ENSCHIG00000009367,ENSCHIG00000010903,ENSCHIG00000012416,ENSCHIG00000015367,ENSCHIG00000016377,ENSCHIG00000017641,ENSCHIG00000019365,ENSCHIG00000021751
GO:0005575	Cellular Component	GO:0030054	cell junction	2	0	ENSCHIG00000011516,ENSCHIG00000021677	--
GO:0005575	Cellular Component	GO:0099512	supramolecular fiber	1	0	ENSCHIG00000021677	--
GO:0005575	Cellular Component	GO:0031974	membrane-enclosed lumen	3	7	ENSCHIG00000017334,ENSCHIG00000019909,ENSCHIG00000021023	ENSCHIG00000006042,ENSCHIG00000011289,ENSCHIG00000012416,ENSCHIG00000014072,ENSCHIG00000015367,ENSCHIG00000019365,ENSCHIG00000021751
GO:0005575	Cellular Component	GO:0043226	organelle	13	18	ENSCHIG00000007777,ENSCHIG00000007804,ENSCHIG00000011516,ENSCHIG00000011539,ENSCHIG00000016965,ENSCHIG00000017334,ENSCHIG00000017943,ENSCHIG00000019909,ENSCHIG00000020797,ENSCHIG00000021023,ENSCHIG00000021677,ENSCHIG00000021708,ENSCHIG00000022382	ENSCHIG00000006042,ENSCHIG00000006685,ENSCHIG00000010172,ENSCHIG00000010815,ENSCHIG00000010903,ENSCHIG00000011289,ENSCHIG00000012416,ENSCHIG00000012922,ENSCHIG00000014072,ENSCHIG00000015230,ENSCHIG00000015367,ENSCHIG00000015588,ENSCHIG00000016377,ENSCHIG00000017641,ENSCHIG00000019195,ENSCHIG00000019365,ENSCHIG00000020858,ENSCHIG00000021751
GO:0005575	Cellular Component	GO:0005623	cell	22	22	ENSCHIG00000006038,ENSCHIG00000007777,ENSCHIG00000007804,ENSCHIG00000011258,ENSCHIG00000011516,ENSCHIG00000011539,ENSCHIG00000015639,ENSCHIG00000016657,ENSCHIG00000016965,ENSCHIG00000017334,ENSCHIG00000017943,ENSCHIG00000019220,ENSCHIG00000019909,ENSCHIG00000020797,ENSCHIG00000021023,ENSCHIG00000021677,ENSCHIG00000021708,ENSCHIG00000022382,ENSCHIG00000024771,ENSCHIG00000024967,ENSCHIG00000025277,…	ENSCHIG00000003049,ENSCHIG00000003475,ENSCHIG00000006042,ENSCHIG00000006685,ENSCHIG00000009367,ENSCHIG00000010172,ENSCHIG00000010815,ENSCHIG00000010903,ENSCHIG00000011289,ENSCHIG00000012416,ENSCHIG00000012922,ENSCHIG00000014072,ENSCHIG00000015230,ENSCHIG00000015367,ENSCHIG00000015588,ENSCHIG00000016377,ENSCHIG00000017641,ENSCHIG00000018287,ENSCHIG00000019195,ENSCHIG00000019365,ENSCHIG00000021751,…
GO:0005575	Cellular Component	GO:0044464	cell part	22	22	ENSCHIG00000006038,ENSCHIG00000007777,ENSCHIG00000007804,ENSCHIG00000011258,ENSCHIG00000011516,ENSCHIG00000011539,ENSCHIG00000015639,ENSCHIG00000016657,ENSCHIG00000016965,ENSCHIG00000017334,ENSCHIG00000017943,ENSCHIG00000019220,ENSCHIG00000019909,ENSCHIG00000020797,ENSCHIG00000021023,ENSCHIG00000021677,ENSCHIG00000021708,ENSCHIG00000022382,ENSCHIG00000024771,ENSCHIG00000024967,ENSCHIG00000025277,…	ENSCHIG00000003049,ENSCHIG00000003475,ENSCHIG00000006042,ENSCHIG00000006685,ENSCHIG00000009367,ENSCHIG00000010172,ENSCHIG00000010815,ENSCHIG00000010903,ENSCHIG00000011289,ENSCHIG00000012416,ENSCHIG00000012922,ENSCHIG00000014072,ENSCHIG00000015230,ENSCHIG00000015367,ENSCHIG00000015588,ENSCHIG00000016377,ENSCHIG00000017641,ENSCHIG00000018287,ENSCHIG00000019195,ENSCHIG00000019365,ENSCHIG00000021751,…
GO:0005575	Cellular Component	GO:0044422	organelle part	6	10	ENSCHIG00000011516,ENSCHIG00000011539,ENSCHIG00000017334,ENSCHIG00000019909,ENSCHIG00000021023,ENSCHIG00000021677	ENSCHIG00000006042,ENSCHIG00000010903,ENSCHIG00000011289,ENSCHIG00000012416,ENSCHIG00000014072,ENSCHIG00000015367,ENSCHIG00000016377,ENSCHIG00000019195,ENSCHIG00000019365,ENSCHIG00000021751
