# Supplementary material for: Transcriptome analysis reveals pituitary lncRNA, circRNA and mRNA affecting fertility in high- and low-yielding goats
Source: Front Genet. 2023 Dec 12;14:1303031. doi: 10.3389/fgene.2023.1303031 (PMC10751935; doi:10.3389/fgene.2023.1303031)
Supplement: Supplementary file 5 [file Table11.XLSX]

## Sheet: Sheet1
Table S11 Leizhou goat lambing record
Breed	Overbit	Date of first delivery	Number of lambs in the first litter	Date of second delivery	Number of lambs in second litter	Reproductive condition
Leizhou goat	SZ11160235	2016-12-19	1	2017-9-7	1	low fecundity
Leizhou goat	SZ11160183	2016-11-10	1	2017-7-17	1	low fecundity
Leizhou goat	SZ11160308	2016-11-7	1	2017-7-22	1	low fecundity
Leizhou goat	SZ11160376	2016-11-25	1	2017-8-5	1	low fecundity
Leizhou goat	SZ11160284	2016-10-20	2	2017-7-28	2	high fecundity
Leizhou goat	SZ11160271	2016-7-16	2	2017-2-14	2	high fecundity
Leizhou goat	SZ11160422	2017-2-14	3	2017-10-15	2	high fecundity
