# Supplementary material for: Transcriptome analysis reveals pituitary lncRNA, circRNA and mRNA affecting fertility in high- and low-yielding goats
Source: Front Genet. 2023 Dec 12;14:1303031. doi: 10.3389/fgene.2023.1303031 (PMC10751935; doi:10.3389/fgene.2023.1303031)
Supplement: Supplementary file 6 [file Table4.XLSX]

## Sheet: bar graph
Table S4 GO pathway annotation of DE circRNA target gene
GO ID (level1)	GO Term (level1)	GO ID (level2)	GO Term (level2)	number_of_out (All)	Genes_of_out
GO:0008150	Biological Process	GO:0071840	cellular component organization or biogenesis	4	ENSCHIG00000011473,ENSCHIG00000014199,ENSCHIG00000015032,ENSCHIG00000017624
GO:0008150	Biological Process	GO:0051179	localization	4	ENSCHIG00000011473,ENSCHIG00000015032,ENSCHIG00000017624,ENSCHIG00000017764
GO:0008150	Biological Process	GO:0048518	positive regulation of biological process	3	ENSCHIG00000011473,ENSCHIG00000014199,ENSCHIG00000017624
GO:0008150	Biological Process	GO:0040007	growth	1	ENSCHIG00000011473
GO:0008150	Biological Process	GO:0023052	signaling	3	ENSCHIG00000011473,ENSCHIG00000014199,ENSCHIG00000017624
GO:0008150	Biological Process	GO:0044699	single-organism process	5	ENSCHIG00000011473,ENSCHIG00000014199,ENSCHIG00000015032,ENSCHIG00000017624,ENSCHIG00000017764
GO:0008150	Biological Process	GO:0022610	biological adhesion	1	ENSCHIG00000011473
GO:0008150	Biological Process	GO:0040011	locomotion	1	ENSCHIG00000011473
GO:0008150	Biological Process	GO:0050896	response to stimulus	3	ENSCHIG00000011473,ENSCHIG00000014199,ENSCHIG00000017624
GO:0008150	Biological Process	GO:0032502	developmental process	2	ENSCHIG00000011473,ENSCHIG00000017624
GO:0008150	Biological Process	GO:0002376	immune system process	1	ENSCHIG00000011473
GO:0008150	Biological Process	GO:0032501	multicellular organismal process	2	ENSCHIG00000011473,ENSCHIG00000017624
GO:0008150	Biological Process	GO:0050789	regulation of biological process	3	ENSCHIG00000011473,ENSCHIG00000014199,ENSCHIG00000017624
GO:0008150	Biological Process	GO:0065007	biological regulation	3	ENSCHIG00000011473,ENSCHIG00000014199,ENSCHIG00000017624
GO:0008150	Biological Process	GO:0048519	negative regulation of biological process	1	ENSCHIG00000014199
GO:0008150	Biological Process	GO:0008152	metabolic process	3	ENSCHIG00000011473,ENSCHIG00000014199,ENSCHIG00000017624
GO:0008150	Biological Process	GO:0009987	cellular process	4	ENSCHIG00000011473,ENSCHIG00000014199,ENSCHIG00000015032,ENSCHIG00000017624
GO:0003674	Molecular Function	GO:0005488	binding	4	ENSCHIG00000011473,ENSCHIG00000015032,ENSCHIG00000017624,ENSCHIG00000017764
GO:0003674	Molecular Function	GO:0004871	signal transducer activity	1	ENSCHIG00000011473
GO:0003674	Molecular Function	GO:0060089	molecular transducer activity	1	ENSCHIG00000011473
GO:0003674	Molecular Function	GO:0003824	catalytic activity	2	ENSCHIG00000011473,ENSCHIG00000017624
GO:0005575	Cellular Component	GO:0032991	macromolecular complex	3	ENSCHIG00000011473,ENSCHIG00000015032,ENSCHIG00000022630
GO:0005575	Cellular Component	GO:0044425	membrane part	3	ENSCHIG00000011473,ENSCHIG00000015032,ENSCHIG00000017624
GO:0005575	Cellular Component	GO:0005623	cell	5	ENSCHIG00000011473,ENSCHIG00000014199,ENSCHIG00000015032,ENSCHIG00000017624,ENSCHIG00000022630
GO:0005575	Cellular Component	GO:0044464	cell part	5	ENSCHIG00000011473,ENSCHIG00000014199,ENSCHIG00000015032,ENSCHIG00000017624,ENSCHIG00000022630
GO:0005575	Cellular Component	GO:0016020	membrane	3	ENSCHIG00000011473,ENSCHIG00000015032,ENSCHIG00000017624
GO:0005575	Cellular Component	GO:0044422	organelle part	2	ENSCHIG00000015032,ENSCHIG00000017624
GO:0005575	Cellular Component	GO:0031974	membrane-enclosed lumen	1	ENSCHIG00000017624
GO:0005575	Cellular Component	GO:0043226	organelle	3	ENSCHIG00000014199,ENSCHIG00000015032,ENSCHIG00000017624
