# Supplementary material for: Transcriptome analysis reveals pituitary lncRNA, circRNA and mRNA affecting fertility in high- and low-yielding goats
Source: Front Genet. 2023 Dec 12;14:1303031. doi: 10.3389/fgene.2023.1303031 (PMC10751935; doi:10.3389/fgene.2023.1303031)
Supplement: Supplementary file 7 [file Table1.XLSX]

## Sheet: DE lncRNAS
Table S1 Expression information the different expression lncRNAs (DE lncRNAs )
id	baseMean LZ-H-Group	baseMean LZ-L-Group	baseMean LZ-H-Group	foldChange(LZ-H-Group/LZ-L-Group)	log2FoldChange	pval
ENSCHIT00000009877	149.552	261.716	0	0	-Inf	0.00211937
MSTRG.52870.6	45.0671	0	105.156	Inf	Inf	0.00338275
ENSCHIT00000005480	40.4437	0	94.3687	Inf	Inf	0.00539422
ENSCHIT00000009854	67.3258	117.82	0	0	-Inf	0.00780249
MSTRG.45842.5	29.6893	0	69.275	Inf	Inf	0.0116069
ENSCHIT00000001883	112.765	0	263.118	Inf	Inf	0.017887
ENSCHIT00000008199	86.4334	151.258	0	0	-Inf	0.0186923
ENSCHIT00000005446	40.4279	70.7488	0	0	-Inf	0.0244367
ENSCHIT00000001385	39.4122	68.9714	0	0	-Inf	0.0264858
MSTRG.33887.2	42.8862	0	100.068	Inf	Inf	0.0292522
ENSCHIT00000001330	33.6398	58.8696	0	0	-Inf	0.0364857

## Sheet: DE circRNAS
Table S1 Expression information the different expression circRNAs (DE circRNAs )
id	baseMean LZ-H-Group	baseMean LZ-L-Group	baseMean LZ-H-Group	foldChange(LZ-H-Group/LZ-L-Group)	log2FoldChange	pval
chicirc_061339	3.09994	0	7.23319	Inf	Inf	0.034695
chicirc_002310	2.8169	0	6.57277	Inf	Inf	0.0390008
chicirc_131778	2.78921	0	6.50815	Inf	Inf	0.0419608
chicirc_100669	5.5023	0.205324	12.5649	61.1956	5.93536	0.0440996
chicirc_183746	2.42536	0	5.65917	Inf	Inf	0.0453685
chicirc_153539	2.58513	0	6.03196	Inf	Inf	0.0469212

## Sheet: DE mRNAS
Table S1 Expression information the different expression mRNAs (DE mRNAs )
id	baseMean LZ-H-Group	baseMean LZ-L-Group	baseMean LZ-H-Group	foldChange(LZ-H-Group/LZ-L-Group)	log2FoldChange	pval
ENSCHIG00000010903	1562.01	2432.44	401.452	0.165041	-2.5991	2.88637e-11
ENSCHIG00000015639	77.0011	41.3032	124.598	3.01667	1.59296	8.72624e-05
ENSCHIG00000019909	138.825	80.1334	217.08	2.70899	1.43775	0.00013329
ENSCHIG00000005334	38.1301	55.9219	14.4076	0.257639	-1.95658	0.000635319
ENSCHIG00000023094	81.9643	49.9058	124.709	2.49889	1.32129	0.000684063
ENSCHIG00000020304	1115.24	1505.57	594.791	0.395061	-1.33985	0.000689686
ENSCHIG00000025277	24.4978	10.0518	43.759	4.35333	2.12212	0.000949427
ENSCHIG00000026769	290.765	376.065	177.032	0.47075	-1.08697	0.00109493
ENSCHIG00000019365	397.088	514.276	240.838	0.468305	-1.09448	0.00110074
ENSCHIG00000016151	61.9784	35.3338	97.5046	2.75953	1.46442	0.0012317
ENSCHIG00000007322	106.693	143.376	57.7811	0.403003	-1.31114	0.00127452
ENSCHIG00000020858	74.4608	123.866	8.58719	0.0693265	-3.85045	0.00128652
ENSCHIG00000017843	19.1331	7.68494	34.3972	4.47593	2.16219	0.00203949
ENSCHIG00000003475	164.47	238.036	66.3831	0.278879	-1.84229	0.00259065
ENSCHIG00000018895	16.651	6.7794	29.8132	4.39761	2.13672	0.00373925
ENSCHIG00000016377	133.936	170.596	85.0573	0.49859	-1.00407	0.00451145
ENSCHIG00000014571	50.6093	31.9025	75.5518	2.36821	1.2438	0.00510707
ENSCHIG00000026258	34.0242	48.4192	14.8308	0.3063	-1.70698	0.0051409
ENSCHIG00000020804	180.805	283.72	43.5862	0.153624	-2.70252	0.00517164
ENSCHIG00000017723	100.193	69.8166	140.696	2.01522	1.01094	0.00544657
ENSCHIG00000024967	60.9644	32.3409	99.1289	3.06512	1.61595	0.00546597
ENSCHIG00000006685	32.756	46.8614	13.9488	0.297661	-1.74826	0.00564405
ENSCHIG00000026739	39.2287	23.1277	60.6968	2.62442	1.392	0.00572166
ENSCHIG00000012922	67.5454	97.6124	27.4562	0.281278	-1.82993	0.00666624
ENSCHIG00000015230	97.5417	129.697	54.6676	0.421502	-1.24639	0.0067383
ENSCHIG00000022554	82.8992	56.6648	117.878	2.08027	1.05677	0.00680463
ENSCHIG00000013658	594.261	800.272	319.579	0.399339	-1.32431	0.0069216
ENSCHIG00000021677	94.702	61.8252	138.538	2.2408	1.16401	0.00718848
ENSCHIG00000022845	212.329	303.428	90.8632	0.299455	-1.73959	0.00751242
ENSCHIG00000020317	39.0658	54.0137	19.1353	0.354267	-1.49709	0.00839112
ENSCHIG00000006042	142.899	193.48	75.4578	0.390004	-1.35844	0.0089994
ENSCHIG00000019220	10.9491	1.46437	23.5955	16.1131	4.01016	0.0120583
ENSCHIG00000017334	4.53014	0.480911	9.92912	20.6465	4.36782	0.0130412
ENSCHIG00000012753	629.797	804.892	396.337	0.492411	-1.02207	0.0131686
ENSCHIG00000020182	215.353	275.664	134.939	0.489507	-1.0306	0.014404
ENSCHIG00000007777	26.7855	15.4391	41.9139	2.71478	1.44084	0.0147575
ENSCHIG00000021553	3.00124	0	7.00289	Inf	Inf	0.0153047
ENSCHIG00000017943	32.6605	14.6207	56.7135	3.87898	1.95568	0.0174354
ENSCHIG00000016965	24.2935	13.3547	38.8785	2.91121	1.54162	0.017685
ENSCHIG00000019195	190.447	248.327	113.275	0.456153	-1.13241	0.0187689
ENSCHIG00000016089	16.587	24.6322	5.86009	0.237904	-2.07155	0.0188931
ENSCHIG00000019952	33.7436	20.9095	50.8558	2.43218	1.28225	0.0198768
ENSCHIG00000007804	59.4023	41.421	83.3775	2.01293	1.0093	0.0200922
ENSCHIG00000024771	46.6578	3.04988	104.802	34.3625	5.10276	0.0204717
ENSCHIG00000010815	98.1162	137.222	45.9754	0.335044	-1.57758	0.0210816
ENSCHIG00000017105	47.519	60.7296	29.9049	0.492427	-1.02202	0.0215936
ENSCHIG00000015588	4176.94	7133.02	235.485	0.0330134	-4.92081	0.0222543
ENSCHIG00000011060	6.78586	1.71003	13.5536	7.92599	2.98659	0.0229743
ENSCHIG00000026036	32.5694	44.2952	16.9348	0.382317	-1.38716	0.0233734
ENSCHIG00000021751	465.285	653.033	214.954	0.329163	-1.60312	0.0235776
ENSCHIG00000003049	7.57195	12.2119	1.38531	0.113439	-3.14001	0.0283344
ENSCHIG00000014217	102.237	139.319	52.7927	0.378933	-1.39999	0.0285413
ENSCHIG00000020847	51.3512	65.8896	31.9666	0.485154	-1.04348	0.028786
ENSCHIG00000026726	29.3248	18.5223	43.728	2.36083	1.23929	0.0289324
ENSCHIG00000019025	15.96	8.08858	26.4552	3.27069	1.7096	0.0295014
ENSCHIG00000003436	34.4744	19.8905	53.9197	2.71083	1.43874	0.0297608
ENSCHIG00000014072	309.75	400.532	188.707	0.471142	-1.08577	0.0316072
ENSCHIG00000020797	26.613	16.2929	40.3732	2.47796	1.30915	0.0321498
ENSCHIG00000021708	6.43139	1.81351	12.5886	6.94155	2.79526	0.0328769
ENSCHIG00000022382	29.1204	16.9328	45.3705	2.67944	1.42193	0.0329201
ENSCHIG00000017641	7842.32	11829.9	2525.56	0.21349	-2.22776	0.0338522
ENSCHIG00000016851	2671.36	3676.98	1330.53	0.361855	-1.46652	0.0346594
ENSCHIG00000011539	37.9026	25.1085	54.9614	2.18896	1.13024	0.0356045
ENSCHIG00000015367	125.901	172.973	63.1392	0.365023	-1.45394	0.0359634
ENSCHIG00000011258	19.687	11.6366	30.4209	2.61425	1.3864	0.0373341
ENSCHIG00000004660	3.0629	0	7.14676	Inf	Inf	0.0376247
ENSCHIG00000013525	4.33904	0.751536	9.12238	12.1383	3.6015	0.0390238
ENSCHIG00000012416	404.607	537.793	227.026	0.422144	-1.24419	0.0412354
ENSCHIG00000011516	11.0143	4.97837	19.0621	3.82898	1.93696	0.0413331
ENSCHIG00000021876	5.2859	1.21081	10.7194	8.85306	3.14618	0.0413681
ENSCHIG00000014876	13.7752	4.54419	26.0832	5.73991	2.52103	0.0416398
ENSCHIG00000010172	15.3631	21.8476	6.71696	0.307446	-1.7016	0.0419087
ENSCHIG00000016657	86.1427	51.9761	131.698	2.53382	1.34132	0.0419107
ENSCHIG00000006038	35.3448	24.1447	50.2782	2.08238	1.05823	0.0420994
ENSCHIG00000009441	3.01434	0.248986	6.70147	26.915	4.75034	0.0421942
ENSCHIG00000017153	393.778	574.715	152.529	0.265399	-1.91377	0.0431257
ENSCHIG00000018623	17.0008	24.9571	6.39241	0.256137	-1.96502	0.0433588
ENSCHIG00000024382	34.6187	45.408	20.2329	0.445579	-1.16625	0.0433912
ENSCHIG00000021023	23.3753	14.5584	35.1311	2.41312	1.2709	0.0449502
ENSCHIG00000005870	87.395	53.206	132.98	2.49935	1.32155	0.0457787
ENSCHIG00000009367	670.65	880.341	391.063	0.444218	-1.17066	0.0463943
ENSCHIG00000014905	10.6462	15.8776	3.671	0.231206	-2.11275	0.048222
ENSCHIG00000011289	824.304	1133.14	412.518	0.364047	-1.4578	0.0482884
ENSCHIG00000018287	74.8159	104.058	35.8259	0.344286	-1.53832	0.0489988
