# Supplementary material for: Transcriptome analysis reveals pituitary lncRNA, circRNA and mRNA affecting fertility in high- and low-yielding goats
Source: Front Genet. 2023 Dec 12;14:1303031. doi: 10.3389/fgene.2023.1303031 (PMC10751935; doi:10.3389/fgene.2023.1303031)
Supplement: Supplementary file 8 [file Table10.XLSX]

## Sheet: Sheet1
Table S10 Protein information in protein-protein interaction networks
node_name	Degree	score
THBS1	2	0
PIWIL4	1	0
LXN	1	0.588
SLC44A5	1	0
LRTM2	1	0.8
TRPM8	2	0
KCNA2	1	0.427
IL33	1	0.553
SYCP1	1	0
ENSCHIP00000019703	1	0.648
IGFBP1	1	0
ENSCHIP00000017119	1	0.41
HBA1	1	0
HBA2	1	0
ENSCHIP00000007376	2	0.426
TAC1	3	0.49
DUSP4	1	0.412
CDKN1A	1	0.426
OSMR	2	0.419
SERPINE1	4	0.456
BAG3	2	0.498
TNFRSF12A	3	0
DUSP5	2	0.443
ATF3	4	0.513
