# Supplementary material for: Transcriptome analysis reveals pituitary lncRNA, circRNA and mRNA affecting fertility in high- and low-yielding goats
Source: Front Genet. 2023 Dec 12;14:1303031. doi: 10.3389/fgene.2023.1303031 (PMC10751935; doi:10.3389/fgene.2023.1303031)
Supplement: Supplementary file 9 [file Table5.XLSX]

## Sheet: Sheet1
Table S5 DE circRNA target gene KEGG pathway annotation
KEGG_A_class	KEGG_B_class	Pathway	out (3)	All (8783)	Pvalue	Qvalue	Pathway ID	Genes	K_IDs
Environmental Information Processing	Signal transduction	MAPK signaling pathway - fly	1	31	0.0105525	0.0801224	ko04013	ENSCHIG00000017624	K08840
Genetic Information Processing	Folding, sorting and degradation	SNARE interactions in vesicular transport	1	33	0.0112307	0.0801224	ko04130	ENSCHIG00000015032	K08491
Cellular Processes	Cellular community - eukaryotes	Adherens junction	1	77	0.0260738	0.0801224	ko04520	ENSCHIG00000011473	K04388
Human Diseases	Cancer: specific types	Pancreatic cancer	1	78	0.0264095	0.0801224	ko05212	ENSCHIG00000011473	K04388
Human Diseases	Cancer: specific types	Chronic myeloid leukemia	1	80	0.0270804	0.0801224	ko05220	ENSCHIG00000011473	K04388
Human Diseases	Cancer: specific types	Colorectal cancer	1	95	0.0321029	0.0801224	ko05210	ENSCHIG00000011473	K04388
Human Diseases	Endocrine and metabolic disease	AGE-RAGE signaling pathway in diabetic complications	1	97	0.0327713	0.0801224	ko04933	ENSCHIG00000011473	K04388
Environmental Information Processing	Signal transduction	TGF-beta signaling pathway	1	102	0.0344409	0.0801224	ko04350	ENSCHIG00000011473	K04388
Organismal Systems	Development and regeneration	Osteoclast differentiation	1	115	0.0387727	0.0801224	ko04380	ENSCHIG00000011473	K04388
Organismal Systems	Immune system	Th17 cell differentiation	1	125	0.0420961	0.0801224	ko04659	ENSCHIG00000011473	K04388
Environmental Information Processing	Signal transduction	FoxO signaling pathway	1	131	0.0440864	0.0801224	ko04068	ENSCHIG00000011473	K04388
Organismal Systems	Endocrine system	Relaxin signaling pathway	1	132	0.0444179	0.0801224	ko04926	ENSCHIG00000011473	K04388
Human Diseases	Infectious disease: parasitic	Chagas disease	1	133	0.0447492	0.0801224	ko05142	ENSCHIG00000011473	K04388
Cellular Processes	Transport and catabolism	Autophagy - animal	1	141	0.0473975	0.0801224	ko04140	ENSCHIG00000015032	K08491
Human Diseases	Cancer: specific types	Gastric cancer	1	151	0.0507009	0.0801224	ko05226	ENSCHIG00000011473	K04388
Environmental Information Processing	Signal transduction	Hippo signaling pathway	1	172	0.0576133	0.0801224	ko04390	ENSCHIG00000011473	K04388
Human Diseases	Cancer: specific types	Hepatocellular carcinoma	1	173	0.0579416	0.0801224	ko05225	ENSCHIG00000011473	K04388
Cellular Processes	Cell growth and death	Cellular senescence	1	179	0.0599099	0.0801224	ko04218	ENSCHIG00000011473	K04388
Human Diseases	Infectious disease: viral	Hepatitis B	1	182	0.060893	0.0801224	ko05161	ENSCHIG00000011473	K04388
Human Diseases	Cancer: overview	Transcriptional misregulation in cancer	1	227	0.0755578	0.0944473	ko05202	ENSCHIG00000011473	K04388
Human Diseases	Infectious disease: viral	Human T-cell leukemia virus 1 infection	1	262	0.0868576	0.0994325	ko05166	ENSCHIG00000011473	K04388
Cellular Processes	Transport and catabolism	Endocytosis	1	264	0.0875006	0.0994325	ko04144	ENSCHIG00000011473	K04388
Environmental Information Processing	Signal transduction	MAPK signaling pathway	1	287	0.0948723	0.102483	ko04010	ENSCHIG00000011473	K04388
Environmental Information Processing	Signaling molecules and interaction	Cytokine-cytokine receptor interaction	1	298	0.0983838	0.102483	ko04060	ENSCHIG00000011473	K04388
Human Diseases	Cancer: overview	Pathways in cancer	1	561	0.179661	0.179661	ko05200	ENSCHIG00000011473	K04388
