# Supplementary material for: Transcriptome analysis reveals pituitary lncRNA, circRNA and mRNA affecting fertility in high- and low-yielding goats
Source: Front Genet. 2023 Dec 12;14:1303031. doi: 10.3389/fgene.2023.1303031 (PMC10751935; doi:10.3389/fgene.2023.1303031)
Supplement: Supplementary file 10 [file Table7.XLSX]

## Sheet: Sheet1
Table S7 DE mRNA target gene KEGG pathway annotation
KEGG_A_class	KEGG_B_class	Pathway	out (31)	All (8783)	Pvalue	Qvalue	Pathway ID	Genes	K_IDs
Human Diseases	Infectious disease: parasitic	Malaria	3	71	0.00193467	0.193467	ko05144	ENSCHIG00000017641;ENSCHIG00000019220;ENSCHIG00000024771	K16857+K13822+K13822
Cellular Processes	Cell growth and death	p53 signaling pathway	3	92	0.00404352	0.202176	ko04115	ENSCHIG00000006042;ENSCHIG00000017641;ENSCHIG00000020858	K06625+K16857+K03982
Human Diseases	Cancer: specific types	Bladder cancer	2	39	0.00823701	0.274567	ko05219	ENSCHIG00000006042;ENSCHIG00000017641	K06625+K16857
Human Diseases	Infectious disease: parasitic	African trypanosomiasis	2	49	0.0127898	0.29996	ko05143	ENSCHIG00000019220;ENSCHIG00000024771	K13822+K13822
Environmental Information Processing	Signaling molecules and interaction	Cytokine-cytokine receptor interaction	4	298	0.0198554	0.29996	ko04060	ENSCHIG00000009367;ENSCHIG00000014217;ENSCHIG00000018287;ENSCHIG00000020304	K05057+K05505+K05149+K12967
Human Diseases	Cancer: specific types	Basal cell carcinoma	2	62	0.019991	0.29996	ko05217	ENSCHIG00000006042;ENSCHIG00000017723	K06625+K11101
Organismal Systems	Development and regeneration	Dorso-ventral axis formation	1	6	0.0209972	0.29996	ko04320	ENSCHIG00000007777	K02156
Cellular Processes	Cell growth and death	Cellular senescence	3	179	0.0246261	0.307826	ko04218	ENSCHIG00000006042;ENSCHIG00000015230;ENSCHIG00000020858	K06625+K02830+K03982
Organismal Systems	Immune system	Complement and coagulation cascades	2	82	0.0336147	0.373497	ko04610	ENSCHIG00000014905;ENSCHIG00000020858	K04003+K03982
Human Diseases	Drug resistance: antineoplastic	Platinum drug resistance	2	89	0.0390404	0.390404	ko01524	ENSCHIG00000006042;ENSCHIG00000011258	K06625+K00799
Metabolism	Lipid metabolism	Arachidonic acid metabolism	2	102	0.0499288	0.453898	ko00590	ENSCHIG00000013525;ENSCHIG00000022554	K17726+K07418
Organismal Systems	Sensory system	Inflammatory mediator regulation of TRP channels	2	114	0.0608374	0.506978	ko04750	ENSCHIG00000022554;ENSCHIG00000026726	K07418+K04983
Environmental Information Processing	Signal transduction	HIF-1 signaling pathway	2	131	0.0775401	0.530332	ko04066	ENSCHIG00000006042;ENSCHIG00000020858	K06625+K03982
Human Diseases	Endocrine and metabolic disease	Maturity onset diabetes of the young	1	26	0.0879513	0.530332	ko04950	ENSCHIG00000017334	K07292
Environmental Information Processing	Signaling molecules and interaction	Neuroactive ligand-receptor interaction	3	338	0.115187	0.530332	ko04080	ENSCHIG00000007322;ENSCHIG00000022845;ENSCHIG00000024967	K04299+K05239+K04615
Human Diseases	Cancer: overview	MicroRNAs in cancer	2	172	0.122687	0.530332	ko05206	ENSCHIG00000006042;ENSCHIG00000017641	K06625+K16857
Human Diseases	Cancer: specific types	Hepatocellular carcinoma	2	173	0.123859	0.530332	ko05225	ENSCHIG00000006042;ENSCHIG00000011258	K06625+K00799
Environmental Information Processing	Signal transduction	JAK-STAT signaling pathway	2	180	0.132136	0.530332	ko04630	ENSCHIG00000006042;ENSCHIG00000009367	K06625+K05057
Human Diseases	Cancer: specific types	Thyroid cancer	1	40	0.132159	0.530332	ko05216	ENSCHIG00000006042	K06625
Metabolism	Lipid metabolism	Linoleic acid metabolism	1	43	0.141359	0.530332	ko00591	ENSCHIG00000022554	K07418
Environmental Information Processing	Signal transduction	Hedgehog signaling pathway	1	48	0.156482	0.530332	ko04340	ENSCHIG00000017723	K11101
Environmental Information Processing	Signal transduction	PI3K-Akt signaling pathway	3	399	0.1648	0.530332	ko04151	ENSCHIG00000006042;ENSCHIG00000009367;ENSCHIG00000017641	K06625+K05057+K16857
Human Diseases	Cancer: overview	Proteoglycans in cancer	2	210	0.168933	0.530332	ko05205	ENSCHIG00000006042;ENSCHIG00000017641	K06625+K16857
Human Diseases	Infectious disease: viral	Kaposi sarcoma-associated herpesvirus infection	2	219	0.180312	0.530332	ko05167	ENSCHIG00000006042;ENSCHIG00000014217	K06625+K05505
Human Diseases	Cancer: specific types	Endometrial cancer	1	58	0.18596	0.530332	ko05213	ENSCHIG00000006042	K06625
Metabolism	Metabolism of other amino acids	Glutathione metabolism	1	60	0.191734	0.530332	ko00480	ENSCHIG00000011258	K00799
Metabolism	Xenobiotics biodegradation and metabolism	Drug metabolism - cytochrome P450	1	62	0.197469	0.530332	ko00982	ENSCHIG00000011258	K00799
Organismal Systems	Endocrine system	GnRH secretion	1	62	0.197469	0.530332	ko04929	ENSCHIG00000024967	K04615
Cellular Processes	Cell growth and death	Ferroptosis	1	64	0.203165	0.530332	ko04216	ENSCHIG00000004660	K18495
Organismal Systems	Sensory system	Taste transduction	1	65	0.205998	0.530332	ko04742	ENSCHIG00000024967	K04615
Human Diseases	Cancer: specific types	Non-small cell lung cancer	1	65	0.205998	0.530332	ko05223	ENSCHIG00000006042	K06625
Organismal Systems	Immune system	Cytosolic DNA-sensing pathway	1	67	0.211635	0.530332	ko04623	ENSCHIG00000020304	K12967
Organismal Systems	Endocrine system	Ovarian steroidogenesis	1	68	0.214439	0.530332	ko04913	ENSCHIG00000022554	K07418
Organismal Systems	Digestive system	Mineral absorption	1	68	0.214439	0.530332	ko04978	ENSCHIG00000020804	K14739
Human Diseases	Cancer: specific types	Renal cell carcinoma	1	69	0.217233	0.530332	ko05211	ENSCHIG00000006042	K06625
Metabolism	Xenobiotics biodegradation and metabolism	Metabolism of xenobiotics by cytochrome P450	1	70	0.220018	0.530332	ko00980	ENSCHIG00000011258	K00799
Human Diseases	Cancer: specific types	Melanoma	1	70	0.220018	0.530332	ko05218	ENSCHIG00000006042	K06625
Human Diseases	Infectious disease: bacterial	Pertussis	1	74	0.231061	0.530332	ko05133	ENSCHIG00000014905	K04003
Human Diseases	Cancer: specific types	Glioma	1	75	0.233798	0.530332	ko05214	ENSCHIG00000006042	K06625
Metabolism	Xenobiotics biodegradation and metabolism	Drug metabolism - other enzymes	1	76	0.236526	0.530332	ko00983	ENSCHIG00000011258	K00799
Human Diseases	Infectious disease: bacterial	Legionellosis	1	77	0.239244	0.530332	ko05134	ENSCHIG00000014217	K05505
Human Diseases	Cancer: specific types	Pancreatic cancer	1	78	0.241953	0.530332	ko05212	ENSCHIG00000006042	K06625
Human Diseases	Cancer: specific types	Chronic myeloid leukemia	1	80	0.247343	0.530332	ko05220	ENSCHIG00000006042	K06625
Environmental Information Processing	Signal transduction	ErbB signaling pathway	1	82	0.252695	0.530332	ko04012	ENSCHIG00000006042	K06625
Environmental Information Processing	Signaling molecules and interaction	ECM-receptor interaction	1	85	0.260655	0.530332	ko04512	ENSCHIG00000017641	K16857
Human Diseases	Cancer: overview	Chemical carcinogenesis - DNA adducts	1	86	0.26329	0.530332	ko05204	ENSCHIG00000011258	K00799
Organismal Systems	Immune system	IL-17 signaling pathway	1	87	0.265916	0.530332	ko04657	ENSCHIG00000014217	K05505
Environmental Information Processing	Signal transduction	MAPK signaling pathway	2	287	0.269049	0.530332	ko04010	ENSCHIG00000011289;ENSCHIG00000012922	K04459+K04459
Human Diseases	Drug resistance: antineoplastic	Endocrine resistance	1	94	0.284046	0.530332	ko01522	ENSCHIG00000006042	K06625
Human Diseases	Cancer: specific types	Colorectal cancer	1	95	0.2866	0.530332	ko05210	ENSCHIG00000006042	K06625
Environmental Information Processing	Signaling molecules and interaction	Viral protein interaction with cytokine and cytokine receptor	1	96	0.289146	0.530332	ko04061	ENSCHIG00000014217	K05505
Human Diseases	Cancer: specific types	Prostate cancer	1	96	0.289146	0.530332	ko05215	ENSCHIG00000006042	K06625
Organismal Systems	Nervous system	GABAergic synapse	1	97	0.291683	0.530332	ko04727	ENSCHIG00000024967	K04615
Human Diseases	Endocrine and metabolic disease	AGE-RAGE signaling pathway in diabetic complications	1	97	0.291683	0.530332	ko04933	ENSCHIG00000020858	K03982
Human Diseases	Cancer: overview	Choline metabolism in cancer	1	97	0.291683	0.530332	ko05231	ENSCHIG00000026769	K15377
Environmental Information Processing	Signal transduction	TGF-beta signaling pathway	1	102	0.304235	0.537351	ko04350	ENSCHIG00000017641	K16857
Human Diseases	Cancer: specific types	Small cell lung cancer	1	103	0.30672	0.537351	ko05222	ENSCHIG00000006042	K06625
Human Diseases	Substance dependence	Morphine addiction	1	105	0.311663	0.537351	ko05032	ENSCHIG00000024967	K04615
Human Diseases	Cancer: overview	Pathways in cancer	3	561	0.317609	0.53832	ko05200	ENSCHIG00000006042;ENSCHIG00000011258;ENSCHIG00000017723	K06625+K00799+K11101
Organismal Systems	Endocrine system	Parathyroid hormone synthesis, secretion and action	1	112	0.328698	0.538408	ko04928	ENSCHIG00000006042	K06625
Organismal Systems	Immune system	Antigen processing and presentation	1	116	0.338249	0.538408	ko04612	ENSCHIG00000021553	K07980
Environmental Information Processing	Signal transduction	TNF signaling pathway	1	116	0.338249	0.538408	ko04668	ENSCHIG00000014217	K05505
Human Diseases	Infectious disease: parasitic	Amoebiasis	1	121	0.350002	0.538408	ko05146	ENSCHIG00000014217	K05505
Human Diseases	Infectious disease: viral	Human papillomavirus infection	2	352	0.354526	0.538408	ko05165	ENSCHIG00000006042;ENSCHIG00000017641	K06625+K16857
Environmental Information Processing	Signal transduction	AMPK signaling pathway	1	124	0.356956	0.538408	ko04152	ENSCHIG00000017334	K07292
Environmental Information Processing	Signal transduction	NF-kappa B signaling pathway	1	126	0.361553	0.538408	ko04064	ENSCHIG00000014217	K05505
Organismal Systems	Nervous system	Serotonergic synapse	1	128	0.366117	0.538408	ko04726	ENSCHIG00000022554	K07418
Human Diseases	Immune disease	Rheumatoid arthritis	1	128	0.366117	0.538408	ko05323	ENSCHIG00000014217	K05505
Environmental Information Processing	Signal transduction	FoxO signaling pathway	1	131	0.372905	0.538638	ko04068	ENSCHIG00000006042	K06625
Human Diseases	Infectious disease: parasitic	Chagas disease	1	133	0.377391	0.538638	ko05142	ENSCHIG00000020858	K03982
Cellular Processes	Cell growth and death	Cell cycle	1	140	0.392848	0.538638	ko04110	ENSCHIG00000006042	K06625
Organismal Systems	Endocrine system	Estrogen signaling pathway	1	140	0.392848	0.538638	ko04915	ENSCHIG00000024967	K04615
Human Diseases	Cancer: specific types	Breast cancer	1	143	0.399359	0.538638	ko05224	ENSCHIG00000006042	K06625
Organismal Systems	Immune system	Natural killer cell mediated cytotoxicity	1	145	0.403661	0.538638	ko04650	ENSCHIG00000005334	K07986
Human Diseases	Cancer: specific types	Gastric cancer	1	151	0.416391	0.538638	ko05226	ENSCHIG00000006042	K06625
Human Diseases	Cardiovascular disease	Fluid shear stress and atherosclerosis	1	155	0.424731	0.538638	ko05418	ENSCHIG00000011258	K00799
Environmental Information Processing	Signal transduction	Wnt signaling pathway	1	158	0.43091	0.538638	ko04310	ENSCHIG00000026036	K02165
Environmental Information Processing	Signal transduction	Apelin signaling pathway	1	158	0.43091	0.538638	ko04371	ENSCHIG00000020858	K03982
Organismal Systems	Endocrine system	Oxytocin signaling pathway	1	158	0.43091	0.538638	ko04921	ENSCHIG00000006042	K06625
Human Diseases	Endocrine and metabolic disease	Cushing syndrome	1	158	0.43091	0.538638	ko04934	ENSCHIG00000006042	K06625
Environmental Information Processing	Signal transduction	Hippo signaling pathway	1	172	0.458908	0.557981	ko04390	ENSCHIG00000020858	K03982
Human Diseases	Infectious disease: viral	Hepatitis C	1	173	0.460855	0.557981	ko05160	ENSCHIG00000006042	K06625
Human Diseases	Infectious disease: viral	Hepatitis B	1	182	0.478084	0.557981	ko05161	ENSCHIG00000006042	K06625
Cellular Processes	Transport and catabolism	Phagosome	1	183	0.479965	0.557981	ko04145	ENSCHIG00000017641	K16857
Cellular Processes	Cell growth and death	Necroptosis	1	184	0.48184	0.557981	ko04217	ENSCHIG00000020304	K12967
Human Diseases	Infectious disease: viral	Influenza A	1	186	0.485569	0.557981	ko05164	ENSCHIG00000020304	K12967
Organismal Systems	Immune system	NOD-like receptor signaling pathway	1	188	0.489273	0.557981	ko04621	ENSCHIG00000014217	K05505
Organismal Systems	Immune system	Chemokine signaling pathway	1	189	0.491115	0.557981	ko04062	ENSCHIG00000014217	K05505
Cellular Processes	Cellular community - eukaryotes	Focal adhesion	1	192	0.496603	0.557981	ko04510	ENSCHIG00000017641	K16857
Human Diseases	Cancer: overview	Transcriptional misregulation in cancer	1	227	0.556541	0.611584	ko05202	ENSCHIG00000006042	K06625
Human Diseases	Cancer: overview	Viral carcinogenesis	1	227	0.556541	0.611584	ko05203	ENSCHIG00000006042	K06625
Environmental Information Processing	Signal transduction	Rap1 signaling pathway	1	232	0.564519	0.612084	ko04015	ENSCHIG00000017641	K16857
Environmental Information Processing	Signal transduction	cAMP signaling pathway	1	235	0.569238	0.612084	ko04024	ENSCHIG00000024967	K04615
Human Diseases	Infectious disease: viral	Human T-cell leukemia virus 1 infection	1	262	0.609546	0.636424	ko05166	ENSCHIG00000006042	K06625
Human Diseases	Infectious disease: viral	Human cytomegalovirus infection	1	263	0.610967	0.636424	ko05163	ENSCHIG00000006042	K06625
Human Diseases	Infectious disease: viral	Epstein-Barr virus infection	1	263	0.610967	0.636424	ko05169	ENSCHIG00000006042	K06625
Human Diseases	Neurodegenerative disease	Alzheimer disease	1	387	0.753252	0.776548	ko05010	ENSCHIG00000026036	K02165
Genetic Information Processing	Translation	Ribosome	1	412	0.775077	0.790371	ko03010	ENSCHIG00000010903	K02981
Human Diseases	Infectious disease: viral	Herpes simplex virus 1 infection	1	421	0.782467	0.790371	ko05168	ENSCHIG00000005870	K09228
Metabolism	Global and overview maps	Metabolic pathways	3	1649	0.947926	0.947926	ko01100	ENSCHIG00000011258;ENSCHIG00000013525;ENSCHIG00000022554	K00799+K17726+K07418
