# Supplementary material for: Transcriptome analysis reveals pituitary lncRNA, circRNA and mRNA affecting fertility in high- and low-yielding goats
Source: Front Genet. 2023 Dec 12;14:1303031. doi: 10.3389/fgene.2023.1303031 (PMC10751935; doi:10.3389/fgene.2023.1303031)
Supplement: Supplementary file 11 [file Table8.XLSX]

## Sheet: network
Node1	Node2
ENSCHIT00000009854	ZNF800
ENSCHIT00000001883	KRR1
ENSCHIG00000000089	ENSCHIT00000005446
ENSCHIT00000001381	THBS1
ENSCHIG00000000297	ENSCHIT00000005480
MSTRG.29468.1	PHACTR3
ENSCHIT00000006921	MKRN3
ENSCHIG00000010903	ENSCHIT00000003239
ENSCHIG00000010903	ENSCHIT00000003238
ENSCHIG00000010903	ENSCHIT00000003236
ENSCHIT00000005902	RFX8
AMIGO2	ENSCHIT00000002077
AMIGO2	ENSCHIT00000002076
AMIGO2	ENSCHIT00000002074
GGH	MSTRG.33887.2
ENSCHIT00000010306	TAC1
ENSCHIT00000001368	THBS1
ENSCHIT00000005901	RFX8
ENSCHIT00000010298	TAC1
DUSP5	ENSCHIT00000006769
DUSP5	ENSCHIT00000006767
ENSCHIT00000010293	TAC1
ENSCHIG00000019711	ENSCHIT00000001385
CBLN1	ENSCHIT00000005602
CBLN1	ENSCHIT00000005590
CBLN1	ENSCHIT00000005606
CBLN1	ENSCHIT00000005596
ENSCHIT00000001379	THBS1
MSTRG.45842.5	PTPRC
ENSCHIT00000001475	RD3
ENSCHIT00000001378	THBS1
ENSCHIG00000017105	ENSCHIT00000002216
ENSCHIG00000017105	ENSCHIT00000002218
ENSCHIT00000008199	TSC22D2
ENSCHIG00000007384	MSTRG.52870.6
ENSCHIT00000001476	RD3
ENSCHIT00000006629	FOXI2
ENSCHIT00000002481	FIBIN
ENSCHIT00000011242	OTOS
ENSCHIT00000006628	FOXI2
ENSCHIT00000010304	TAC1
ENSCHIT00000002482	FIBIN
ENSCHIT00000001370	THBS1
ENSCHIT00000010290	TAC1
DKK2	ENSCHIT00000009873
DKK2	ENSCHIT00000009879
DKK2	ENSCHIT00000009875
DKK2	ENSCHIT00000009877
ENSCHIT00000001382	THBS1
ENSCHIT00000001330	RORA

## Sheet:  attributes
Node	Regulation	Type	Degree
MSTRG.52870.6	Up Regulation	lncRNA	1
ENSCHIT00000003236	Nodiff	lncRNA	1
FOXI2	Down Regulation	mRNA	2
ENSCHIT00000009854	Down Regulation	lncRNA	1
ENSCHIT00000002076	Nodiff	lncRNA	1
ENSCHIT00000001883	Up Regulation	lncRNA	1
FIBIN	Down Regulation	mRNA	2
OTOS	Up Regulation	mRNA	1
ENSCHIG00000000089	Nodiff	mRNA	1
ENSCHIT00000001381	Nodiff	lncRNA	1
MKRN3	Down Regulation	mRNA	1
KRR1	Nodiff	mRNA	1
ENSCHIG00000000297	Nodiff	mRNA	1
MSTRG.29468.1	Nodiff	lncRNA	1
ENSCHIT00000009879	Nodiff	lncRNA	1
ENSCHIT00000006921	Nodiff	lncRNA	1
ENSCHIT00000005446	Down Regulation	lncRNA	1
ENSCHIG00000010903	Down Regulation	mRNA	3
ENSCHIT00000005596	Nodiff	lncRNA	1
ENSCHIT00000006769	Nodiff	lncRNA	1
ENSCHIT00000005902	Nodiff	lncRNA	1
RD3	Up Regulation	mRNA	2
AMIGO2	Down Regulation	mRNA	3
PHACTR3	Up Regulation	mRNA	1
ENSCHIT00000001385	Down Regulation	lncRNA	1
GGH	Nodiff	mRNA	1
ENSCHIT00000003238	Nodiff	lncRNA	1
ENSCHIT00000010306	Nodiff	lncRNA	1
ENSCHIT00000009873	Nodiff	lncRNA	1
ENSCHIT00000001368	Nodiff	lncRNA	1
ENSCHIT00000002077	Nodiff	lncRNA	1
ENSCHIT00000003239	Nodiff	lncRNA	1
ENSCHIT00000005901	Nodiff	lncRNA	1
ENSCHIT00000010298	Nodiff	lncRNA	1
DUSP5	Down Regulation	mRNA	2
ENSCHIT00000005480	Up Regulation	lncRNA	1
ENSCHIT00000010293	Nodiff	lncRNA	1
ENSCHIG00000019711	Nodiff	mRNA	1
ENSCHIT00000009877	Down Regulation	lncRNA	1
ENSCHIT00000005606	Nodiff	lncRNA	1
CBLN1	Up Regulation	mRNA	4
ENSCHIT00000001379	Nodiff	lncRNA	1
MSTRG.45842.5	Up Regulation	lncRNA	1
ENSCHIT00000001475	Nodiff	lncRNA	1
ENSCHIT00000001378	Nodiff	lncRNA	1
ENSCHIG00000017105	Down Regulation	mRNA	2
ENSCHIT00000008199	Down Regulation	lncRNA	1
ENSCHIG00000007384	Nodiff	mRNA	1
ENSCHIT00000001476	Nodiff	lncRNA	1
ENSCHIT00000006629	Nodiff	lncRNA	1
ENSCHIT00000002074	Nodiff	lncRNA	1
THBS1	Down Regulation	mRNA	6
ENSCHIT00000002481	Nodiff	lncRNA	1
RFX8	Up Regulation	mRNA	2
ENSCHIT00000011242	Nodiff	lncRNA	1
RORA	Nodiff	mRNA	1
ENSCHIT00000006628	Nodiff	lncRNA	1
ENSCHIT00000010304	Nodiff	lncRNA	1
ENSCHIT00000002482	Nodiff	lncRNA	1
MSTRG.33887.2	Up Regulation	lncRNA	1
ENSCHIT00000002218	Nodiff	lncRNA	1
ENSCHIT00000001370	Nodiff	lncRNA	1
ENSCHIT00000010290	Nodiff	lncRNA	1
ENSCHIT00000006767	Nodiff	lncRNA	1
ENSCHIT00000009875	Nodiff	lncRNA	1
PTPRC	Nodiff	mRNA	1
ENSCHIT00000002216	Nodiff	lncRNA	1
ENSCHIT00000005602	Nodiff	lncRNA	1
DKK2	Down Regulation	mRNA	4
ENSCHIT00000001382	Nodiff	lncRNA	1
TAC1	Down Regulation	mRNA	5
ENSCHIT00000005590	Nodiff	lncRNA	1
ENSCHIT00000001330	Down Regulation	lncRNA	1
ZNF800	Nodiff	mRNA	1
TSC22D2	Nodiff	mRNA	1
